# Supplementary material for: PTX3 mediates PI3K/AKT/mTOR signaling to downregulate apoptosis and autophagy to attenuate myocardial injury in sepsis
Source: PeerJ journal article supplement (doi:10.7717/peerj.17263), 2024-05-20
Supplement: Date.zip [file Date.zip]

## Sheet: Sheet1
EF%
73	33	42
79	36	47
86	40	51
FS%
46	11	18
49	14	20
53	17	23
LVAW
0.68	0.33	0.39
0.73	0.35	0.42
0.76	0.38	0.46
LVID
2.25	4.81	4.56
2.32	4.94	4.62
2.14	4.77	4.4
